# Supplementary material for: The Effect of Prebiotics and Oral Anti-Diabetic Agents on Gut Microbiome in Patients with Type 2 Diabetes: A Systematic Review and Network Meta-Analysis of Randomised Controlled Trials
Source: MDPI journal article supplement (doi:10.3390/nu14235139), 2022-12-02
Supplement: s1 [file s1]

**Figure S1.** Network Plots.

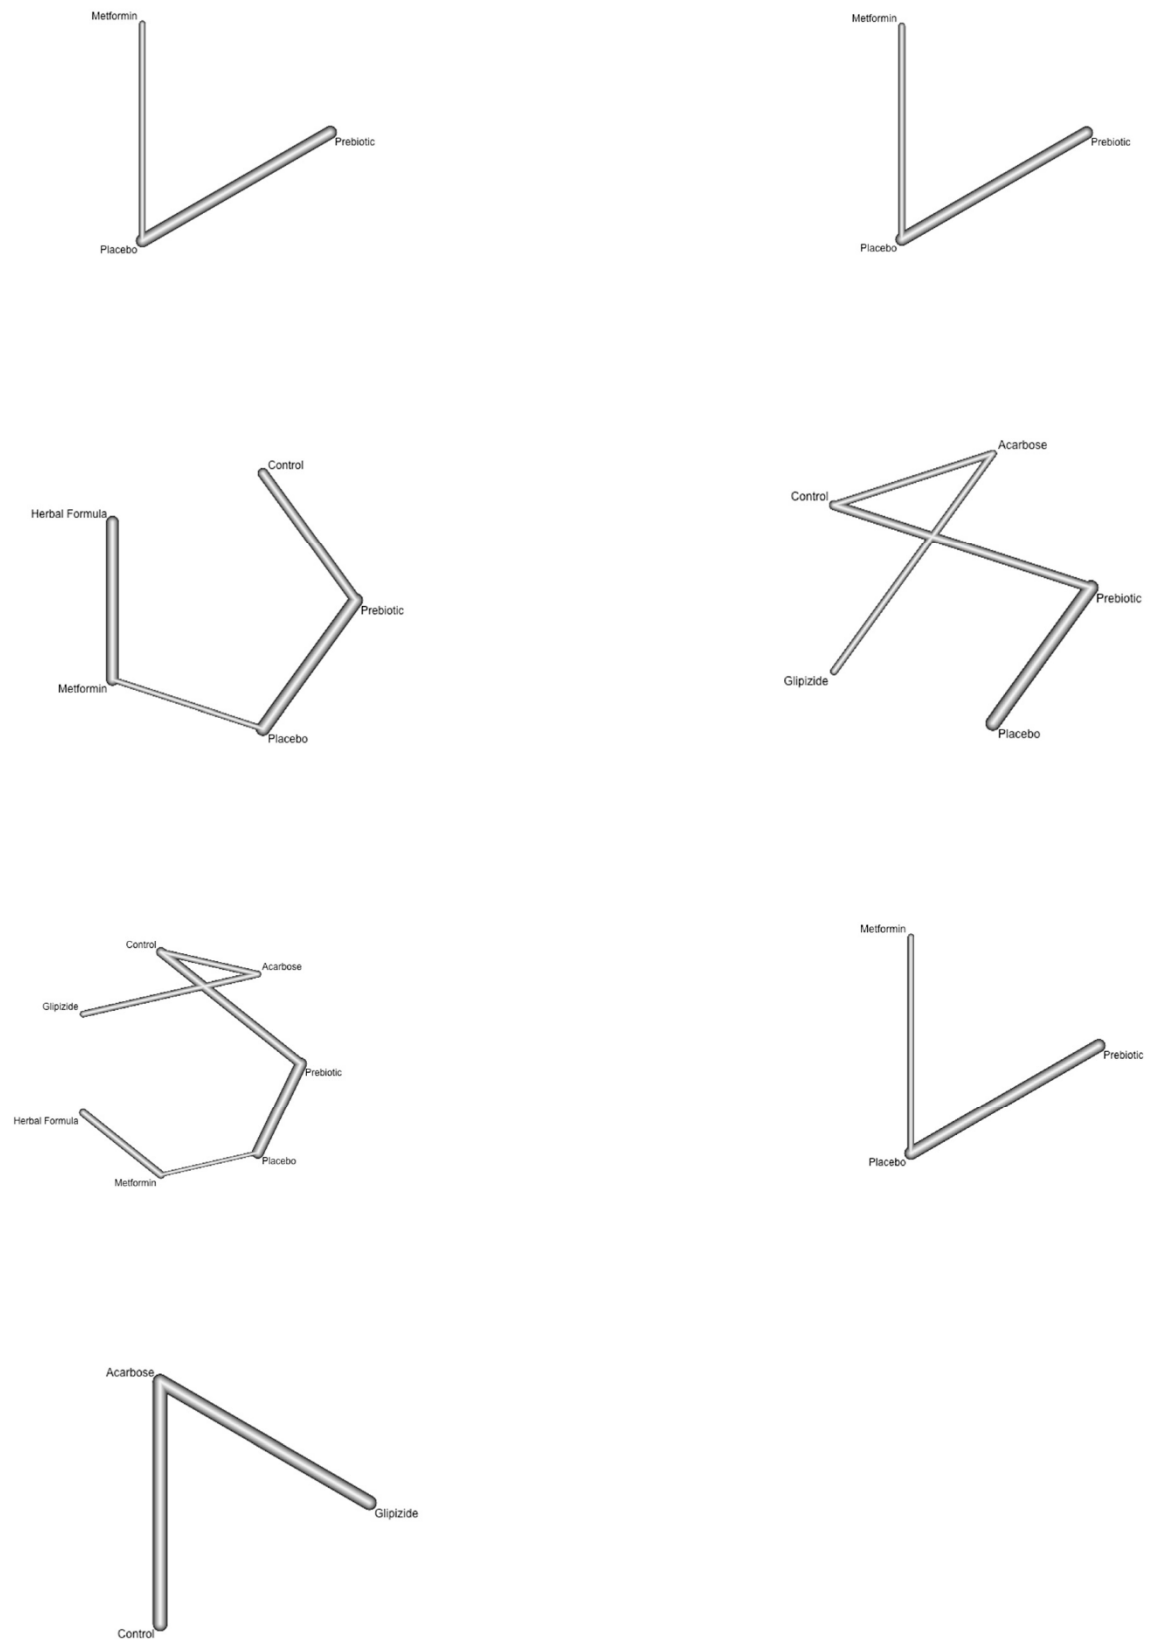

**Table S1.** The effect of prebiotics and oral anti-diabetic agents on gut microbiome in patients with type 2 diabetes – Mean Age (Years) and Sex Distribution

| Outcomes             | Treatments                  | Mean Age (years)                          | Sex Distribution                                                                                   |
|----------------------|-----------------------------|-------------------------------------------|----------------------------------------------------------------------------------------------------|
| Bifidobacterium      | Prebiotics Vs Placebo       | Prebiotic: 54.4<br>Placebo: 53.8          | Prebiotic Male: 29<br>Prebiotic Female: 57<br>Placebo Male: 27<br>Placebo Female: 57               |
|                      | Metformin Vs Placebo        | Metformin: 63.1<br>Placebo: 63.1          | Metformin Male: 5<br>Metformin Female:3<br>Placebo Male: 4<br>Placebo Female:5                     |
|                      |                             |                                           |                                                                                                    |
| Lactobacillus        | Prebiotics Vs Placebo       | Prebiotic:56.2<br>Placebo:53.4            | Prebiotic Male: 50<br>Prebiotic Female:97<br>Placebo Male: 42<br>Placebo Female: 101               |
|                      | Metformin Vs Placebo        | Metformin: 63.1<br>Placebo: 63.1          | Metformin Male: 5<br>Metformin Female:3<br>Placebo Male: 4<br>Placebo Female:5                     |
|                      |                             |                                           |                                                                                                    |
| Akkermansia          | Prebiotics Vs Placebo       | Prebiotic:56.2<br>Placebo:53.4            | Prebiotic Male: 50<br>Prebiotic Female:97<br>Placebo Male: 42<br>Placebo Female: 101               |
|                      | Metformin Vs Placebo        | Metformin: 63.1<br>Placebo: 63.1          | Metformin Male: 5<br>Metformin Female:3<br>Placebo Male: 4<br>Placebo Female:5                     |
|                      |                             |                                           |                                                                                                    |
| Glycated Haemoglobin | Prebiotics Vs Control       | Prebiotic: 58.4<br>Control: 57.7          | Prebiotic Male: 17<br>Prebiotic Female: 24<br>Control Male: 16<br>Control Female: 23               |
|                      | Acarbose Vs Control         | Acarbose: 55.7<br>Control: 56.5           | Acarbose Male: 32<br>Acarbose Female: 27<br>Control Male: 17<br>Control Female: 19                 |
|                      | Acarbose Vs Glipizide       | Acarbose: 53<br>Glipizide: 54             | Acarbose Male: 34<br>Acarbose Female: 17<br>Glipizide Male: 24<br>Glipizide Female: 19             |
|                      | Metformin Vs Herbal Formula | Metformin: 58.55<br>Herbal Formula: 59.00 | Metformin Male: 50<br>Metformin Female: 50<br>Herbal Formula Male: 50<br>Herbal Formula Female: 50 |
|                      | Metformin Vs Placebo        | Metformin: 63.1<br>Placebo: 63.1          | Metformin Male: 5<br>Metformin Female:3<br>Placebo Male: 4                                         |

|                            |                             |                                           |                                                                                                    |
|----------------------------|-----------------------------|-------------------------------------------|----------------------------------------------------------------------------------------------------|
|                            |                             |                                           | Placebo Female:5                                                                                   |
|                            |                             |                                           |                                                                                                    |
| Fasting Blood Glucose      | Prebiotics Vs Control       | Prebiotic: 58.66<br>Control: 58.04        | Prebiotic Male: 20<br>Prebiotic Female: 29<br>Control Male: 18<br>Control Female: 28               |
|                            | Acarbose Vs Control         | Acarbose: 55.7<br>Control: 56.5           | Acarbose Male: 32<br>Acarbose Female: 27<br>Control Male: 17<br>Control Female: 19                 |
|                            | Acarbose Vs Glipizide       | Acarbose: 53<br>Glipizide: 54             | Acarbose Male: 34<br>Acarbose Female: 17<br>Glipizide Male: 24<br>Glipizide Female: 19             |
|                            | Metformin Vs Herbal Formula | Metformin: 58.55<br>Herbal Formula: 59.00 | Metformin Male: 50<br>Metformin Female: 50<br>Herbal Formula Male: 50<br>Herbal Formula Female: 50 |
|                            |                             |                                           |                                                                                                    |
| Postprandial Blood Glucose | Acarbose Vs Control         | Acarbose: 55.7<br>Control: 56.5           | Acarbose Male: 32<br>Acarbose Female: 27<br>Control Male: 17<br>Control Female: 19                 |
|                            | Acarbose Vs Glipizide       | Acarbose: 53<br>Glipizide: 54             | Acarbose Male: 34<br>Acarbose Female: 17<br>Glipizide Male: 24<br>Glipizide Female: 19             |
|                            | Metformin Vs Herbal Formula | Metformin: 58.55<br>Herbal Formula: 59.00 | Metformin Male: 50<br>Metformin Female: 50<br>Herbal Formula Male: 50<br>Herbal Formula Female: 50 |
|                            |                             |                                           |                                                                                                    |
| Body Mass Index            | Prebiotics Vs Control       | Prebiotic: 58.73<br>Control: 57.63        | Prebiotic Male: 23<br>Prebiotic Female: 32<br>Control Male: 21<br>Control Female: 32               |
|                            | Acarbose Vs Glipizide       | Acarbose: 53<br>Glipizide: 54             | Acarbose Male: 34<br>Acarbose Female: 17<br>Glipizide Male: 24<br>Glipizide Female: 19             |
|                            | Metformin Vs Placebo        | Metformin: 63.1<br>Placebo: 63.1          | Metformin Male: 5<br>Metformin Female:3<br>Placebo Male: 4<br>Placebo Female:5                     |
|                            | Metformin Vs Herbal Formula | Metformin: 58.55<br>Herbal Formula: 59.00 | Metformin Male: 50<br>Metformin Female: 50<br>Herbal Formula Male: 50                              |

|  |  |  |                              |
|--|--|--|------------------------------|
|  |  |  | Herbal Formula<br>Female: 50 |
|--|--|--|------------------------------|
